# Supplementary material for: Polarization contrasts and their effect on the gaze stabilization of crustaceans
Source: Oxford University Press journal article supplement (doi:10.1242/jeb.229898), 2021-03-10
Supplement: jeb229898supp.pdf [file jeb229898supp.pdf]

## Supplementary figures

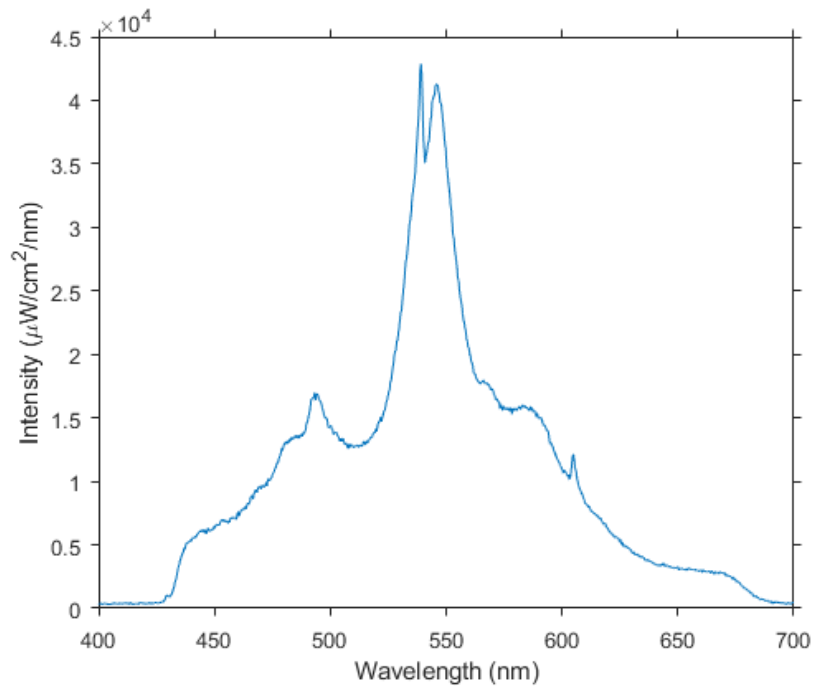

**Fig. S1.** Spectrum of light emitted from the intensity/polarization display. Projector pixels set to maximum RGB values (255,255,255). Measured with a Flame spectrophotometer coupled to a 600nm diameter bare optic fibre and calibrated using a DH-2000 calibrated light source (all Ocean Insight, Orlando, USA).

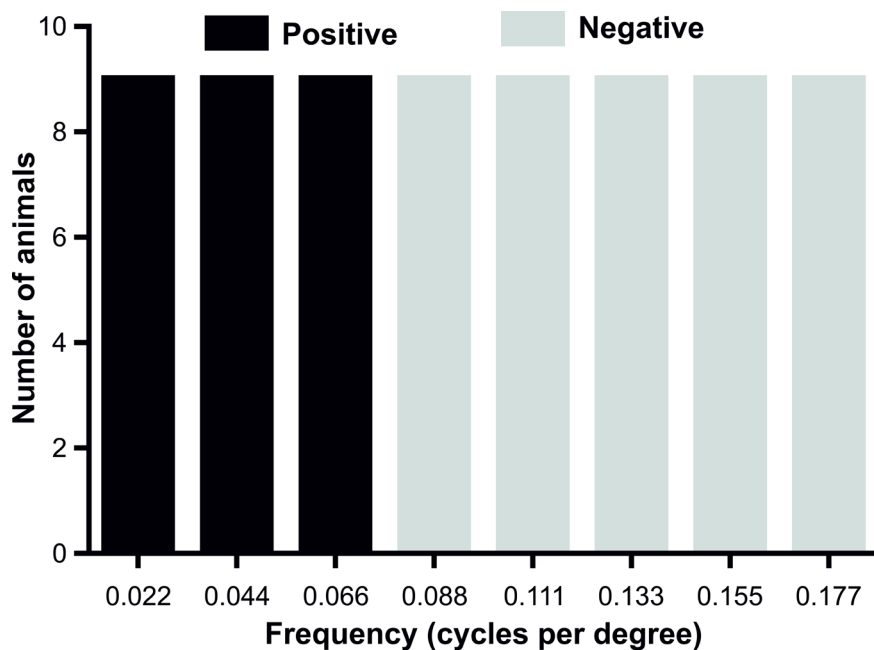

**Fig. S2.** Gaze stabilisation response of the hermit crab *Pagurus bernhardus* to full contrast intensity gratings varying in spatial frequency.
